# Supplementary figures and images for: Indoor Inactivation of SARS-CoV-2 Virus by Liquid Hyperoxygen
Source: MDPI journal article supplement (doi:10.3390/pathogens13030244), 2024-03-11

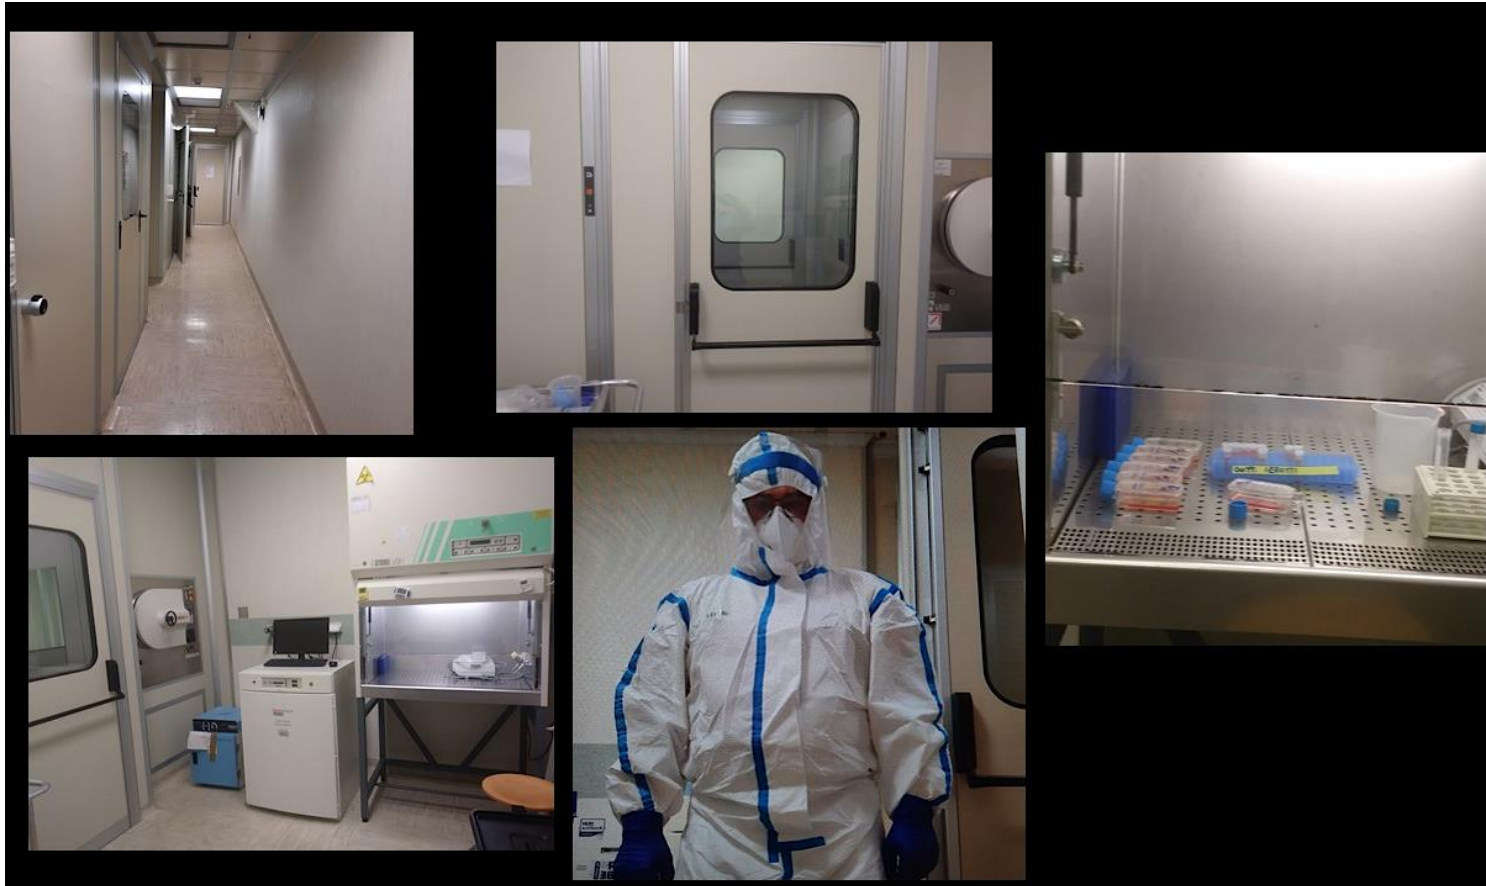

**Figure S1.** Demonstration of the working space.

Supplement: s1 [file s1]
